# Supplementary material for: Revealing a Novel Potential Pest of Plum Trees in the Caucasus: A Species Resembling the European Leaf-Mining Stigmella plagicolella, Nepticulidae
Source: MDPI journal article supplement (doi:10.3390/insects15030198), 2024-03-15
Supplement: s1 [file s1]

**Table 1.** The CO1-5' mitotypes of *Stigmella colchica* sp. nov. (SC1–SC8) and *S. plagicolella* (SP1–SP20), sequences and GenBank accession IDs, countries of origin. Sequences obtained during this study are marked with \*.

| Mitotype | Sequence ID  | GenBank accession ID | Country  |
|----------|--------------|----------------------|----------|
| SC1      | SC5540*      | PP318246             | Georgia  |
| SC2      | SC5533*      | PP318247             | Georgia  |
|          | SC5534*      | PP318248             |          |
|          | SC5535*      | PP318249             |          |
|          | SC5537*      | PP318250             |          |
|          | SC5545*      | PP318251             |          |
|          | SC5550*      | PP318252             | Türkiye  |
|          | SC5551*      | PP318253             |          |
|          | SC5552*      | PP318254             |          |
|          | SC5553*      | PP318255             |          |
| SC3      | SC5522*      | PP318230             | Georgia  |
|          | SC5523*      | PP318231             |          |
|          | SC5541*      | PP318232             |          |
|          | SC5547*      | PP318233             |          |
| SC4      | SC5544*      | PP318234             | Georgia  |
|          | SC5548*      | PP318235             |          |
| SC5      | SC5526*      | PP318226             | Georgia  |
|          | SC5527*      | PP318227             |          |
|          | SC5528*      | PP318228             |          |
|          | SC5529*      | PP318229             |          |
| SC6      | SC5531*      | PP318236             | Georgia  |
|          | SC5532*      | PP318237             |          |
|          | SC5536*      | PP318238             |          |
| SC7      | SC5538*      | PP318240             | Georgia  |
|          | SC5539*      | PP318241             |          |
|          | SC5542*      | PP318242             |          |
|          | SC5543*      | PP318243             |          |
|          | SC5546*      | PP318244             |          |
|          | SC5549*      | PP318245             |          |
| SC8      | SC5530*      | PP318239             | Georgia  |
| SP1      | GMBUA513-14  | -                    | Bulgaria |
|          | GMBUB1564-14 | -                    |          |
|          | GMBUC1528-14 | -                    |          |
|          | GMBUC1542-14 | -                    |          |
|          | GMBUC1548-14 | -                    |          |
|          | GMBUC1830-14 | -                    |          |
|          | GMBUF1923-14 | -                    |          |
|          | GMBUF1925-14 | -                    |          |
|          | GMBUF1926-14 | -                    |          |
|          | GMBUF1928-14 | -                    |          |
|          | GMBUF1930-14 | -                    |          |
|          | GMBUF1933-14 | -                    |          |
|          | GMBUF1937-14 | -                    |          |
|          | GMBUF1939-14 | -                    |          |

|      |              |          |                 |
|------|--------------|----------|-----------------|
|      | GMBUF1940-14 | -        |                 |
|      | GMBUF1943-14 | -        |                 |
|      | GMBUG1264-14 | -        |                 |
|      | GMBUG2159-14 | -        |                 |
|      | LEEUA014-11  | JN283998 | Denmark         |
|      | SP5560*      | PP318262 | Croatia         |
|      | SP5561*      | PP318263 |                 |
|      | SP5570*      | PP318264 | Lithuania       |
| SP2  | GMBUF1938-14 | -        | Bulgaria        |
| SP3  | GMGMP5652-18 | -        | Germany         |
|      | NEPSE004-11  | KX281339 | Belgium         |
| SP4  | GMBUC1829-14 | -        | Bulgaria        |
| SP5  | GMBUF1918-14 | -        | Bulgaria        |
| SP6  | GMBUC1529-14 | -        | Bulgaria        |
| SP7  | SP5562*      | PP318265 | Croatia         |
| SP8  | GMBUB1792-14 | -        |                 |
|      | GMBUC1550-14 | -        |                 |
|      | GMBUC1827-14 | -        |                 |
|      | GMBUC1828-14 | -        |                 |
|      | GMBUF1931-14 | -        | Bulgaria        |
|      | GMBUF1934-14 | -        |                 |
|      | GMBUF1941-14 | -        |                 |
|      | GMBUF1942-14 | -        |                 |
|      | GMBUG2162-14 | -        |                 |
| SP9  | GMBUF1924-14 | -        | Bulgaria        |
| SP10 | GMBUD1521-14 | -        | Bulgaria        |
| SP11 | GMBUG1269-14 | -        | Bulgaria        |
| SP12 | LEFII214-11  | KT782519 |                 |
|      | LEFIJ1040-11 | KX049419 | Finland         |
|      | LEFIJ1413-12 | KX049533 |                 |
| SP13 | GMBUC1558-14 | -        | Bulgaria        |
| SP14 | NEPSE019-11  | -        | France          |
| SP15 | PHLAJ204-14  | -        | Austria         |
| SP16 | GMGMJ1478-14 | -        | Germany         |
|      | GMGMN826-14  | -        |                 |
|      | NEPSE018-11  | -        | France          |
|      | NLLEA1517-20 | -        | The Netherlands |
|      | SP5554*      | PP318257 |                 |
|      | SP5555*      | PP318256 |                 |
|      | SP5556*      | PP318258 |                 |
|      | SP5557*      | PP318259 | Great Britain   |
|      | SP5558*      | PP318260 |                 |
|      | SP5559*      | PP318261 |                 |
| SP17 | NEPTA1259-15 | -        | Italy           |
|      | NEPTA630-13  | -        | France          |
|      | NEPTA631-13  | -        |                 |
| SP18 | NEPSE003-11  | -        | Belgium         |
| SP19 | NEPTA632-13  | -        | Greece          |
| SP20 | NEPTA633-13  | -        | The Netherlands |
